# Supplementary material for: Cancer-Associated Fibroblasts Differentiated by Exosomes Isolated from Cancer Cells Promote Cancer Cell Invasion
Source: Int J Mol Sci. 2020 Oct 31;21(21):8153. doi: 10.3390/ijms21218153 (PMC7662577; doi:10.3390/ijms21218153)
Supplement: Supplementary file 1 [file ijms-21-08153-s001.pdf]

Supplementary data for

**Cancer-associated fibroblasts differentiated by exosomes isolated from cancer cells promote cancer cell invasion**

Kimin Kim<sup>1†</sup>, Yeh Joo Sohn<sup>1†</sup>, Ruri Lee<sup>1</sup>, Hye Ju Yoo<sup>1</sup>, Ji Yoon Kang<sup>2,3</sup>, Nakwon Choi<sup>2,3</sup>, Dokyun Na<sup>4\*</sup>, Ju Hun Yeon<sup>1\*</sup>

<sup>1</sup>Department of Integrative Biosciences, University of Brain Education (UBE), Cheonan 31228, Republic of Korea

<sup>2</sup>Center for BioMicrosystems, Brain Science Institute, Korea Institute of Science and Technology (KIST), 02792 Seoul, Republic of Korea

<sup>3</sup>Division of Bio-Medical Science & Technology (Biomedical Engineering), KIST school, Korea University of Science and Technology (UST), 02792 Seoul, Republic of Korea

<sup>4</sup>School of Biomedical Engineering, Chung-Ang University, 06974 Seoul, Republic of Korea

\*Co-corresponding authors.

*E-mail address:* [jhyeon@ube.ac.kr](mailto:jhyeon@ube.ac.kr)

Tel.: +82-41-529-2621

Fax.: +82-41-529-2674

Dokyun Na

*E-mail address:* [blisszen@cau.ac.kr](mailto:blisszen@cau.ac.kr)

Tel: +82-2-820-5690

Fax: +82-2-814-2651

**Keywords:** cancer-associated fibroblasts, cancer cells-derived exosomes, invasive cancer cells, cancer cell invasion, 3D microfluidics

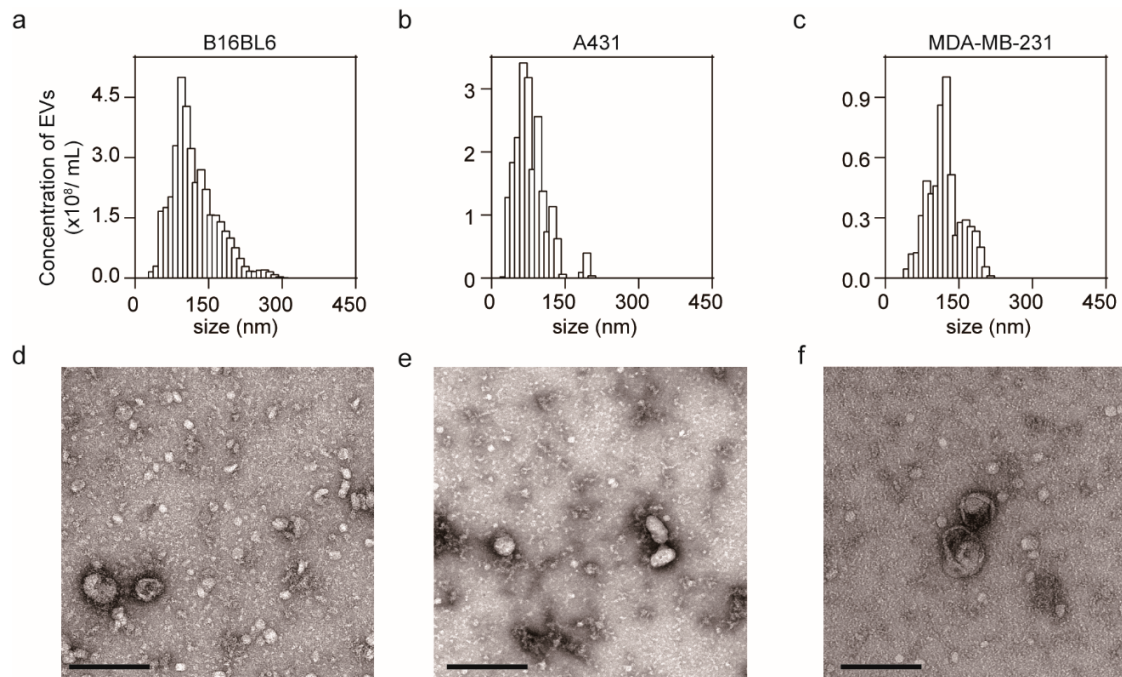

**Supplementary Figure 1. Characterization of isolated exosomes from the three cancer cell lines.**

(a-c) Nanoparticle tracking analysis (NTA) measurements of concentration and size distribution of exosomes from B16BL6, A431, and MDA-MB-231 cells. (d-f) Transmission electron microscopy (TEM) images of exosomes from B16BL6, A431 and MDA-MB-231 cells (Scale bar: 200 nm).

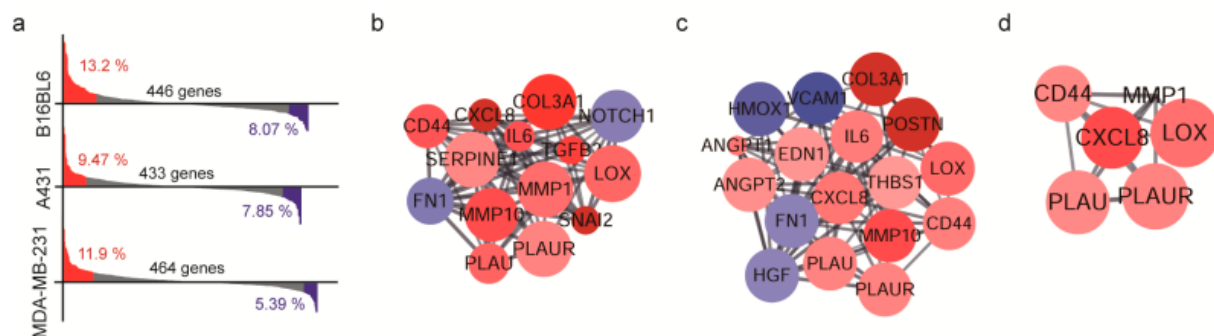

**Supplementary Figure 2. Identification of genes and functions associated with CAFs induced by cancer cells-derived exosomes (eCAFs) derived from cancer cells, respectively.**

(a) Expression levels of mRNAs in eCAFs differentiation-triggered by the exosomes extracted from B16BL6, A431, MDA-MB-231 cells. (b-d) Top module of protein-protein interaction (PPI) network for densely connected nodes. Red DEs with  $\log_2$ fold change  $>1$ ; B16BL6, A431, MDA-MB-231 cells. Blue DEs with  $\log_2$ fold change  $<-1$ . The larger node size, the more significant p-values.

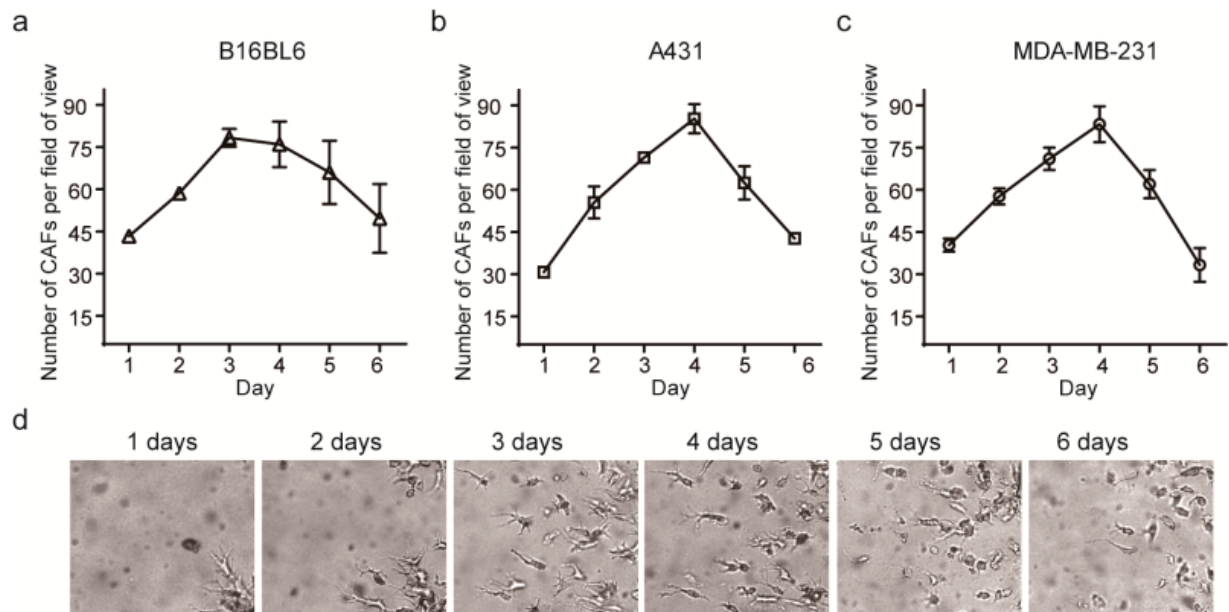

**Supplementary Figure 3. Cancer-associated fibroblasts formation in the microfluidic device.**

(a) B16BL6, (b) A431, (c) MDA-MB-231 cells-derived exosomes increased the number of CAFs, which was highest after 3-4 days, and then gradually decreased. (d) Growth image of CAFs induced by B16BL6 cells-derived exosomes (50  $\mu\text{g/mL}$ ) for 6 days.
